# Supplementary material
Source: PubMed Central journal article supplement (PMC4600429)
Supplement: NIHMS705054-supplement-6.pdf [file NIHMS705054-supplement-6.pdf]

FKBP5 expression  
Th17 signature

|                                                                 | FKBP5 expression | Th17 signature |
|-----------------------------------------------------------------|------------------|----------------|
| 1,1,1-Trichloro-2,2-bis(4-chlorophenyl)ethane (DDT) degradation | Green            | Red            |
| Bacterial invasion of epithelial cells                          | Grey             | Grey           |
| Basal transcription factors                                     | Green            | Grey           |
| Betalain biosynthesis                                           | Green            | Grey           |
| Bile secretion                                                  | Green            | Grey           |
| Biosynthesis of 12-, 14- and 16-membered macrolides             | Grey             | Red            |
| Biosynthesis of type II polyketide products                     | Grey             | Red            |
| Caffeine metabolism                                             | Green            | Grey           |
| Carbohydrate digestion and absorption                           | Green            | Red            |
| Circadian rhythm – plant                                        | Green            | Red            |
| D-Arginine and D-ornithine metabolism                           | Green            | Red            |
| Flavone and flavonol biosynthesis                               | Green            | Red            |
| Indole alkaloid biosynthesis                                    | Green            | Grey           |
| Leishmaniasis                                                   | Green            | Grey           |
| Melanogenesis                                                   | Green            | Grey           |
| mRNA surveillance pathway                                       | Grey             | Grey           |
| Photosynthesis – antenna proteins                               | Grey             | Red            |
| RIG-I-like receptor signaling pathway                           | Green            | Red            |
| Secondary bile acid biosynthesis                                | Grey             | Red            |
| Staphylococcus aureus infection                                 | Grey             | Grey           |
| Steroid biosynthesis                                            | Green            | Red            |
| Vasopressin-regulated water reabsorption                        | Green            | Grey           |
| VEGF signaling pathway                                          | Green            | Grey           |

**KEGG pathways representing predicted functions among:**

- Taxa positively correlated with steroid response (FKBP5)
- Taxa positively correlated with Th17 gene signature
