# Supplementary material
Source: PubMed Central journal article supplement (PMC4600429)

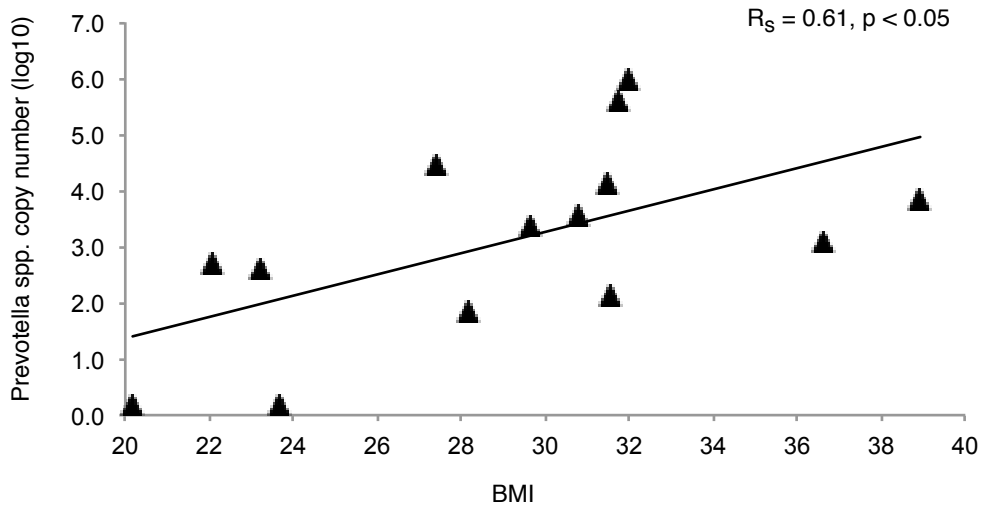

Supplement: NIHMS705054-supplement-7.pdf [file NIHMS705054-supplement-7.pdf]
